# Quantitative Analysis of Plasmodesmata Permeability using Cultured Tobacco BY-2 Cells Entrapped in Microfluidic Chips

1 **Kazunori Shimizu<sup>1,2\*</sup>, Masahiro Kikkawa<sup>1</sup>, Ryo Tabata<sup>2,3</sup>, Daisuke Kurihara<sup>4,5</sup>, Ken-ichi**  
2 **Kurotani<sup>6</sup>, Hiroyuki Honda<sup>1</sup>, Michitaka Notaguchi<sup>2,3,5,6\*</sup>**

3 <sup>1</sup>Department of Biomolecular Engineering, Graduate School of Engineering, Nagoya University,  
4 Nagoya, Japan

5 <sup>2</sup>Institute for Advanced Research, Nagoya University, Nagoya, Japan

6 <sup>3</sup>Graduate School of Bioagricultural Sciences, Nagoya University, Nagoya, Japan

7 <sup>4</sup>JST PRESTO, Nagoya University, Nagoya, Japan

8 <sup>5</sup>Institute of Transformative Bio-Molecules (ITbM), Nagoya University, Nagoya, Japan

9 <sup>6</sup>Bioscience and Biotechnology Center, Nagoya University, Nagoya, Japan

10

11 **\* Correspondence:**

12 Kazunori Shimizu

13 [shimizu@chembio.nagoya-u.ac.jp](mailto:shimizu@chembio.nagoya-u.ac.jp)

14 Michitaka Notaguchi

15 [notaguchi.michitaka@b.mbox.nagoya-u.ac.jp](mailto:notaguchi.michitaka@b.mbox.nagoya-u.ac.jp)

16

17 **Keywords: Plasmodesmata, BY-2 cells, Microdevice, Microfluidic Chip, FRAP imaging**

18

## 19 **Abstract**

20 Plasmodesmata are unique channel structures in plants that link the fluid cytoplasm between adjacent  
21 cells. Plants have evolved these microchannels to allow trafficking of nutritious substances as well as  
22 signaling molecules for intercellular communication. However, tracking the behavior of  
23 plasmodesmata in real time is difficult because they are located inside tissues. Hence, we developed a  
24 microfluidic device that traps cultured cells and fixes their positions to allow testing of plasmodesmata  
25 permeability. The device has 112 tandemly aligned trap zones in the flow channel. Cells of the tobacco  
26 line BY-2 were cultured for 7 days and filtered using a sieve and a cell strainer before use to isolate  
27 short cell clusters consisting of only a few cells. The isolated cells were introduced into the flow  
28 channel, resulting in entrapment of cell clusters at 25 out of 112 trap zones (22.3%). Plasmodesmata  
29 permeability was tested from 1 to 4 days after trapping the cells. During this period, the cell numbers  
30 increased through cell division. Fluorescence recovery after photobleaching experiments using a  
31 transgenic marker line expressing nuclear-localized H2B-GFP demonstrated that cell-to-cell  
32 movement of H2B-GFP protein occurred within 200 min of photobleaching. The transport of H2B-  
33 GFP protein was not observed when sodium chloride, a compound known to cause plasmodesmata  
34 closure, was present in the microfluid channel. Thus, this microfluidic device and one-dimensional  
35 plant cell samples allowed us to observe plasmodesmata behavior in real time under controllable  
36 conditions.

37

## 38 **Introduction**

39 In plants, there are microscopic tunnels that penetrate the cell wall and directly connect the cytoplasm  
40 of neighboring cells. These tunnels, called plasmodesmata (PDs), are ultrafine structures, often as small  
41 as 30 nm in diameter and 100 nm length, and facilitate the movement of materials between cells  
42 (Brunkard et al., 2015). It is estimated that about 1,000–100,000 PDs are located between neighboring  
43 cells (Maule, 2008; Lucas et al., 2009; Xu and Jackson, 2010). Recent studies have shown that PDs are  
44 involved in the transport of proteins, mRNAs, plant hormones, and other substances involved in plant  
45 functions. They also allow the transfer of pathogenic bacteria and viruses between cells (Lucas et al.,  
46 1995; Turgeon and Wolf, 2009; Lee and Lu, 2011; Brunkard et al., 2015; Han and Kim, 2016). Since  
47 PDs are fundamental functional structures for plants and have unique characteristics, they have  
48 attracted much attention for decades, and many studies have focused on elucidating their structures and  
49 functions in detail.

50 Because PDs are ultrafine structures with diameters of only several tens nm and are embedded  
51 in thick cell walls, the methods for analyzing them are limited. For more than 100 years, it has been  
52 extremely difficult to study their functions and structures (Roberts and Oparka, 2003). However, with  
53 the development of electron microscopy, research on PDs has made remarkable progress since the first  
54 structural details were revealed by Ding and his colleagues in 1992 (Ding et al., 1992). Currently,  
55 electron microscopy and confocal microscopy have become the main methods used in research on PDs.  
56 These techniques have made it possible to correlate changes in the function of PDs with changes in  
57 their structure. For example, it has been reported that differences in the permeability of substances at  
58 different growth stages of plants can be related to differences in the structure of PDs (Nicolas et al.,  
59 2017), and changes in the permeability of auxin-responsive substances can be related to structural  
60 changes around PDs (Han et al., 2014). Genetic screening has also succeeded to identify components  
61 regulating PD formation and permeability (Stonebloom et al., 2009; Xu et al., 2012; Benitez-Alfonso  
62 et al., 2013; Brault et al., 2019).

63 However, there are still three major issues with these research methods. First, confocal  
64 microscopy using fluorescent proteins as reporters has a spatial resolution of 250–100 nm, which is  
65 insufficient for detailed observations of PDs. Second, it takes a long time to prepare samples for  
66 microscopic observation, and it often takes about 2 to 4 weeks to grow a plant for observation. Third,  
67 in the case of electron microscopy, it is necessary to fix the tissue for observation, so it is impossible  
68 to study PD behavior in real time in live tissues. In addition, fixation and preparation of sections require  
69 skills, making it difficult to perform simple experiments.

70 The cultured cells used in this study are expected to be useful for analyses of PDs because the  
71 culture cells position in one dimensional allowing us to clearly observe. In fact, intercellular  
72 localization of PD localized proteins has been studied using cultured cells (Knox et al., 2015). However,  
73 floating cultured cells are difficult to observe over time. Moreover, fixing the position of the object is  
74 important especially for high-resolution imaging. Therefore, to further understand PD behavior, a  
75 simple *in vitro* PD analysis method using cultured cells that can be observed over time is necessary.

76 In this study, we aimed to establish a method to assess the permeability of PDs using a  
77 microfluidic device in which cultured plant cells can be fixed in position. We used the tobacco  
78 (*Nicotiana tabacum*) BY-2 cell line, which has been used widely as a model cell in plant cell biology.  
79 The doubling time of BY-2 cells is 12–14 h, which is as short as that of plant cells (Geelen and Inze,  
80 2001; Miyazawa et al., 2003). In addition, BY-2 cells form small clusters consisting of several  
81 cylindrical cells connected in tandem in liquid culture medium. This characteristic makes it possible to  
82 observe permeability via PDs between adjacent cells under a microscope. First, we observed the  
83 properties of BY-2 cells, including their length and linearity, during culture to select the appropriate  
84 duration of culture for cells used in this study. Next, to avoid changing the position of BY-2 cells during  
85 the experiments, we fabricated a microfluidic device with a microchannel to trap the BY-2 cells. Finally,  
86 we explored the permeability of PDs in trapped BY-2 cells by quantitatively assessing fluorescence  
87 recovery after photobleaching (FRAP).

88

## 89 **Materials and Methods**

### 90 **Culturing of tobacco BY-2 cells**

91 Tobacco BY-2 cells were cultured in modified Linsmaier and Skoog (LS) medium (see the following  
92 recipe, Nagata et al., 1992). The BY-2 cell cultures were maintained at 26°C with shaking at 130 rpm  
93 in the dark on a shaking stirrer (NR-3, Titech Co., Ltd., Aichi, Japan) in an incubator (IS-2000, Toyo  
94 Seisakusho Co., Ltd., Chiba, Japan). The medium was dispensed into 300-mL flasks (95 mL  
95 medium/flask). Each flask was capped with a silicon stopper, and autoclaved at 120°C for 20 minutes.  
96 For subculture, 3 mL cell suspension was removed from the flask on the 7<sup>th</sup> day of culture and  
97 transferred to a new flask. For incubation of the H2B-GFP strain, 50 mg/L kanamycin sulfate (117-  
98 00341, Fujifilm Wako Pure Chemicals Co., Ltd., Osaka, Japan) was added to the culture medium.

### 99 **Recipe for modified LS medium**

- 100 · Murashige and Skoog plant salt mixture (392-00591, Fujifilm Wako), 4.6 g/L
- 101 · Sucrose (193-00025, Fujifilm Wako), 30 g/L
- 102 · Potassium Dihydrogen Phosphate (169-04245, Fujifilm Wako), 0.2 g/L
- 103 · Myo-inositol (I5125, Sigma, St. Louis, MO, USA), 0.1 g/L

- 104 · Thiamin hydrochloride (205-00855, Fujifilm Wako), 1.0 mg/L
- 105 · 2,4-dichlorophenoxyacetic acid (040-18532, Fujifilm Wako), 0.2 mg/L
- 106 Adjust pH to 5.8 with KOH

### 107 **Plasmid construction and transformation of tobacco BY-2 cells**

108 To construct HSpro::H2B-sGFP (designated as DKv813), the 446-bp upstream region (−506 to −61  
109 bp) of soybean *Gmhsp17.3-B* (Schöffl et al., 1984) and the full-length coding region of *H2B* (HTB1:  
110 At1g07790) fused to sGFP were cloned into the binary vector pPZP211 (Hajdukiewicz et al., 1994).  
111 To generate transgenic BY-2 cell lines expressing H2B-GFP, *Agrobacterium*-mediated transformation  
112 was performed as previously described (An, 1985). Transformants were selected on modified LS  
113 medium containing 1.5% (w/v) agar and 50 µg mL<sup>-1</sup> kanamycin and then cultured for 3 weeks before  
114 initiating a liquid culture in modified LS medium. The callus cells were transferred to liquid medium  
115 using a sterilized platinum loop. The cells were subcultured once or twice before use to stabilize growth.  
116 The HSpro::H2B-sGFP transgenic cell line constitutively expresses H2B-sGFP without heat shock  
117 treatment in medium culture.

### 118 **Microdevice fabrication**

119 The microfluidic devices were fabricated by replica molding using polydimethylsiloxane (PDMS;  
120 SILPOT 184, DuPont Toray Specialty Materials K.K., Tokyo, Japan) as we reported previously, with  
121 some modifications (Yamaoka et al., 2019). Briefly, the silicon wafer was spin-coated with SU-8 3050  
122 (MicroChem Corp., Newton, MA, USA) at 1750 rpm for 60 s and baked at 95°C for 30 min. The wafer  
123 was exposed to ultraviolet light through a photomask and baked at 95°C for 10 min. After development  
124 using SU-8 developer (MicroChem Corp.), PDMS mixed with a curing reagent at a ratio of 10:1 was  
125 poured onto the mold, and then cured by baking at 70°C for 60 min. Two 1.5-mm diameter holes were  
126 made for an inlet and outlet using a biopsy needle (Kai Industry, Gifu, Japan). Then, the PDMS and a  
127 cover glass were treated with air plasma and bonded to each other.

### 128 **Preparation and image analysis of BY-2 cells**

129 To prepare small clusters of BY-2 cells, the BY-2 cell culture was passed through a 140-µm sieve  
130 (NRK, Tokyo, Japan) and subsequently through 100, 85, 70, 50, and 40-µm cell strainers (pluriSelect  
131 Life Science, Leipzig, Germany). Before and after separation, a 1-mL aliquot of BY-2 cell culture was  
132 mixed with CellTracker Green CMFDA Dye (C7025, Thermo Fisher Scientific, Tokyo, Japan) at 5  
133 µM and incubated for 30 min at 26°C with agitation. Then, 10 µL BY-2 cell-containing medium was  
134 placed on the slide glass and covered with a cover glass. Fluorescence images were obtained using a  
135 fluorescence microscope (BZ-X700, Keyence, Osaka, Japan). The images were analyzed by ImageJ;  
136 the objects were recognized by color threshold and subsequently the objects crossing the edges were  
137 excluded. Then, the minimum length of the minor axis of the approximate minimum ellipse and area  
138 of the objects, *i.e.*, BY-2 cell clusters, were measured. These procedures are illustrated in Figure S1.

### 139 **Introducing BY-2 cells into the microfluidic device**

140 The device was sterilized by exposure to ultraviolet light for 1 h and treated with air plasma to make  
141 the surface of the microchannels hydrophilic. Then, 700 µL medium without cells was placed into the  
142 inlet and allowed to fill the channels. The cell suspension was prepared at a concentration of 500–1000  
143 cells/mL. A 700-µL aliquot of the cell suspension was introduced slowly into the channels from the  
144 inlet. Then, a 700-µL aliquot of medium without cells was introduced to remove the un-trapped cells.

## 145 **Culture of trapped BY-2 cells in the microfluidic device**

146 After introducing cells into the channels, the inlet and outlet of the microchannels were plugged with  
147 P200 filter pipette tips (127-200XS, Watson, Tokyo, Japan) filled with/without culture medium to  
148 prevent the channels from drying. Then, the device with tips was incubated at 26°C in the dark. The  
149 medium was exchanged every 24 h by introducing 700  $\mu$ L medium slowly from the inlet.

## 150 **Quantitative measurement of PD permeability**

151 A culture of BY-2 cells expressing H2B-GFP was prepared at 500–1000 cells/mL as described above.  
152 To avoid unintended physical stress during the cell trapping procedure that may close PDs, and to  
153 increase the number of clusters with three or more cells, we cultured the trapped BY-2 cells for 1 day  
154 or longer.

155 A confocal microscope (LSM510/LSM5 Pascal, Zeiss, Germany) equipped with 488 nm argon  
156 laser (LGK7872ML, LASOS Lasertechnik GmbH, Jena, Germany) was used for observation and  
157 photobleaching. For photobleaching, the settings were as follows: objective lens, Plan-Neofluor  
158 10x/0.3; pinhole, max (141.4  $\mu$ m); laser power, 100%; observation area, 898.2  $\mu$ m  $\times$  898.2  $\mu$ m; laser  
159 irradiation area, 219.1  $\mu$ m  $\times$  219.1  $\mu$ m; photobleaching period by laser scanning, 963.04 msec;  
160 irradiation duration, 25 min. We obtained fluorescence images of the trapped targeted cluster three  
161 times (before, just after, and 200 min after photobleaching). Image analysis was performed using  
162 ImageJ. The objects and nuclei were identified and their mean fluorescence intensity was compared.

## 163 **Statistical analysis**

164 Statistical analysis was performed using Tukey's HSD for independent samples with unequal variance  
165 using Python version 3.7.4 and its library modules including NumPy (1.17.2), Pandas (0.25.1), and  
166 statsmodels (0.12.1). A p-value less than 0.05 was considered statistically significant.

167

## 168 **Results and Discussion**

### 169 **Analysis of shapes of BY-2 cells during culture**

170 Since BY-2 cells form short cell clusters consisting of several cylindrical cells connected in tandem in  
171 liquid culture medium (Figure 1A), we anticipated that it should be relatively easy to observe the  
172 exchange of molecules between cells via PDs. Thus, to design a microfluidic device that can fix the  
173 position of BY-2 cells, we observed the shapes of BY-2 cells under a microscope.

174 Our observations revealed that the BY-2 cells were linear but not uniform in shape and size. In  
175 particular, the degree of bending was different in each cluster (Figure 1B). Since BY-2 cells cultured  
176 in flask batches were passaged every 7 days, we counted the number of cells in one cluster on days 3,  
177 5, and 7. The percentages of clusters containing 10 or more cells were 69.2% (27/39) on day 3, 58.8%  
178 (20/34) on day 5, and only 14.0% (8/57) on day 7. The percentage of clusters containing four or fewer  
179 cells increased to 64.9% (37/57) on day 7 in our conditions (Figure 1C). Since the mitotic index usually  
180 peaked at around days 2 and 3 and declined rapidly (e.g. Magyar et al., 2005), the prolonged cell culture  
181 period might cause break down the long cell cluster to a short.

### 182 **Design and fabrication of microfluidic device for fixing the position of BY-2 cells**



183 We designed and fabricated a microfluidic device for fixing the position of BY-2 cells referring to Kim  
184 et al. 2014 (Figure 2A). In the previous report, cell sorting and trapping were demonstrated using  
185 polystyrene microspheres (sizes: 15  $\mu\text{m}$ , 6  $\mu\text{m}$ , and 4  $\mu\text{m}$ ) and three different waterborne parasites  
186 including *Giardia* cysts (ellipsoid with short and long axes of 8  $\mu\text{m}$  and 19  $\mu\text{m}$ , respectively). To trap  
187 BY-2 cells, in this study, we modified the dimensions and the shape of the trap zones in the microfluidic  
188 device. The device has a main channel and a side channel that are connected by a trap zone (Figure  
189 2B). The cell suspension was added to the main channel through the inlet. According to the simulation  
190 by Kim et al. 2014, the fluidic pressure of the main channel is always higher than that of the side  
191 channel at the same position because the ratio of the width of the inlet and outlet of the trap zone, the  
192 main channel, and the side channel is set to 2:1:8:20. In our preliminary tests, the fluid flowed from  
193 the main channel to the side channel through the trap zone without backflow, and the cells were trapped  
194 in the trap zone.

195 In this study, we designed each trap zone to entrap one short cluster of BY-2 cells (Figure 1C).  
196 The entrance of the trap zone was 50  $\mu\text{m}$ , which is almost the same width of a single cluster of BY-2  
197 cells. The exit of the trap zone was 25  $\mu\text{m}$ , which is narrower than the cell width. The length of the trap  
198 zone was set to 300  $\mu\text{m}$ , which is about the length of a cluster of several cells. The device had a total  
199 of 112 trap zones (Figure 2B).

## 200 **Introducing BY-2 cells into the microfluidic device**

201 We examined whether short clusters of BY-2 cells could be trapped in the developed device. To clearly  
202 observe the location of cells in the device, the cells were stained by CellTracker Green before use. We  
203 introduced an aliquot of cells cultured for 7 days, which contained many small cell clusters, into the  
204 inlet (Figure 1C). However, the cells became clogged in the main channel near the inlet and were not  
205 trapped in the trap zone. Microscopic observations revealed that this was caused by clogging of the  
206 main channel with long cell clusters in the cell suspension. To remove the long clusters, the cell culture  
207 was passed through a sieve and a series of cell strainers (see Materials and Methods). The cell  
208 suspension after this separation step contained shorter and straighter cell clusters (Figure 3A). When  
209 the separated cells were introduced into the device, the cells in short clusters were trapped in the trap  
210 zone (Figure 3B). On average,  $25 \pm 4.5$  cell clusters were trapped by the device with 112 trap zones  
211 (entrapment frequency,  $22.3\% \pm 4.1\%$ ). The number of cells in the trapped cluster at the trap zone was  
212 counted. More than half of the clusters consisted of two cells, the other clusters consisted of one cell  
213 or three or more cells (Figure 3C). Thus, the short clusters were successfully entrapped by the  
214 microfluidic devices.

## 215 **Cultivation of trapped BY-2 in the microfluidic device**

216 To investigate PD permeability using the trapped BY-2 cells, it was important that the cells remained  
217 undamaged. We investigated whether the trapped BY-2 cells retained their proliferation ability in the  
218 device. As shown in Figure 4A, the number of cells in the trapped single cluster at the trap zone  
219 increased over time through cell division and the cluster became longer. The average number of cells  
220 in one trapped cluster was  $1.6 \pm 0.5$  immediately after trapping and increased to  $13.6 \pm 3.8$  after 4 days  
221 of culture (Figure 4B). These results confirmed that trapping by this device did not inhibit cell  
222 proliferation.

223 We calculated the percentage of cells that remained trapped until day 4 (number of clusters  
224 trapped at the trap zone on day 0 / number of clusters trapped at the trap zone on day 4  $\times$  100). This  
225 analysis revealed that  $61.6\% \pm 7.2\%$  of cells remained trapped on day 4. It is likely that the medium

226 flow released some of the trapped cells from the trap zone during 4 days of culture. In future studies,  
227 it should be possible to adjust the trap zone shape and precisely control the flow velocity of the medium  
228 to increase the percentage of trapped cells.

### 229 **Quantitative evaluation of PD permeability by FRAP**

230 We used the BY-2 cells trapped in the trap zone in the microfluidic device to quantitatively evaluate  
231 PD permeability using FRAP. The cytoplasm of each cell in a single cluster is separated by PDs and  
232 molecules in the cytoplasm move between the cells via the PDs. In this study, we used BY-2 cells  
233 expressing a fusion protein of histone H2B and GFP (H2B-GFP). In each cell, H2B-GFP was translated  
234 in the cytoplasm and translocated to the nucleus (Figure S2A). We expected that some H2B-GFP would  
235 permeate through the PDs and diffuse into the cytoplasm of adjacent cells, and then be translocated to  
236 the nucleus as observed for the nuclear localization signal fused GFP and endogenous transcription  
237 factors such as KNOTTED1, LEAFY and SHORTROOT (Jackson et al., 1994; Sessions et al., 2000;  
238 Nakajima et al., 2001; Wu et al., 2003). In our experimental environment, when we photobleached  
239 cells of a part of the cluster, the GFP fluorescence of photobleached cells recovered by about 140  
240 minutes after laser irradiation. However, when all the cells in the cluster were irradiated by the laser,  
241 no recovery of fluorescence was observed by 140 minutes, suggesting that the recovery of fluorescence  
242 was not due to accumulation of GFP produced via *de novo* protein expression, but rather to GFP that  
243 migrated from neighboring cells through PDs (Figures S2B,C). Consequently, we decided to evaluate  
244 the recovery of GFP fluorescence at 200 min after laser irradiation. In the experiment, we used cell  
245 clusters consisting of three or four cells (Figure 5A). As the negative control (NC), all cells in the  
246 cluster, including the cell at position 0, were irradiated with the laser and photobleached. In the  
247 experimental treatment, the cell at position 0 was not laser irradiated, while those at positions 1 and 2  
248 at the end of the cell cluster were irradiated with the laser and photobleached selectively. At 200 min  
249 after photobleaching, the recovery of fluorescence in the cells at positions 1 and 2 was observed and  
250 quantified. By comparing the fluorescence intensity between NC cells and those in the experimental  
251 treatment, the movement of H2B-GFP from the cells at position 0 to those at positions 1 and 2 was  
252 assessed.

253 Figure 5B shows the FRAP results obtained under these experimental conditions. At 200 min  
254 after photobleaching, the fluorescence of the photobleached nuclei was recovered, whereas no recovery  
255 was observed in the NC cells. In the experimental treatment and the control, recovery to the original  
256 fluorescence level was observed at 24 h after photobleaching (Figure S2D). These results suggest that  
257 the recovery of fluorescence was caused by the diffusion of H2B-GFP from the cell at position 0 via  
258 PDs. In other studies, non-specific trafficking of GFP protein in tobacco and Arabidopsis leaves was  
259 also observed in a similar time frame, from several tens of minutes to several hours (Oparka et al.,  
260 1999; Kawade et al., 2013). Therefore, BY-2 cultured cells appear to have functional PDs like those in  
261 intact plant tissues.

262 The FRAP results are shown in Figure 5C. The fluorescence intensity of cells at position 1 and  
263 2 was significantly higher than that of NC cells. Furthermore, the fluorescence intensity of cells at  
264 position 1 was higher than that of cells at position 2, suggesting that the H2B-GFP produced in non-  
265 bleached cells in position 0 was transported to adjacent cells in sequence via PDs. Considering these  
266 results, we can conclude that PD permeability was successfully quantified by this FRAP-based method  
267 using BY-2 cells trapped in a microfluidic device.

268 Finally, we performed a similar experiment using trapped cell clusters treated with 100 mM  
269 sodium chloride (NaCl). In another study, treatment of Arabidopsis leaves with 100 mM NaCl imposed

270 osmotic stress on cells, resulting in PD closure and a reduction in molecular permeability (Grison et  
271 al., 2019). However, it was unknown whether treatment with 100 mM NaCl would reduce the  
272 permeability of PDs in BY-2 cells. We found that the recovery of fluorescence intensity was  
273 significantly suppressed by treatment with 100 mM NaCl (Figure 5C). Thus, treatment with 100 mM  
274 NaCl decreased PD permeability in BY-2 cells. These results provided further evidence that PD  
275 permeability could be successfully quantified in entrapped cultured BY-2 cells.

276

## 277 **Conclusion**

278 We have developed a microfluidic device to trap short clusters of BY-2 cells. By using trapped BY-2  
279 cells expressing H2B-GFP and a FRAP technique, we quantitatively evaluated the permeability of PDs.  
280 This technology will be useful to test the effect of various compounds on PD permeability. Furthermore,  
281 combining this method with mutant strains and/or super-resolution imaging technologies with marker  
282 proteins will allow for further in-depth studies on the molecular mechanisms underlying the function  
283 and regulation of PDs, and on changes in their transport capacity over time.

284

## 285 **Conflict of Interest**

286 The authors declare that the research was conducted in the absence of any commercial or financial  
287 relationships that could be construed as a potential conflict of interest.

## 288 **Author Contributions**

289 KS, RT, HH, and MN conceived this study. MK designed and conducted the main experiments with  
290 advice from KS, RT, HH, and MN. DK constructed transgenic BY-2 cell lines. MK and RT maintained  
291 and prepared the BY-2 cells for experiments. MK and KK performed FRAP experiments. KS, MK,  
292 RT, KK, and MN wrote the paper.

## 293 **Funding**

294 This work was supported by grants from the Japan Society for the Promotion of Science Grants-in-Aid  
295 for Scientific Research (18K05373 and 20H05501 to RT, 18KT0040, 18H03950, and 19H05361 to  
296 MN and 20H03273 to KK and MN), Grant-in-Aid for Scientific Research on Innovative Areas  
297 (20H05358 to DK), the Japan Science and Technology Agency PRESTO program (JPMJPR18K4 to  
298 DK), and the Canon Foundation (R17-0070 to MN).

## 299 **Acknowledgments**

300 We thank Kazuki Yakamoto, Haruo Kassai, and Ikue Yoshikawa for technical assistance.

301

## 302 **References**

303 An, G.H. (1985). High-efficiency transformation of cultured tobacco cells. *Plant Physiology* 79, 568-  
304 570. doi:10.1104/pp.79.2.568



- 305 Benitez-Alfonso, Y., Faulkner, C., Pendle, A., Miyashima, S., Helariutta, Y., and Maule, A. (2013).  
306 Symplastic intercellular connectivity regulates lateral root patterning. *Dev. Cell* 26, 136-47. doi:  
307 10.1016/j.devcel.2013.06.010
- 308 Brault, M. L., Petit, J. D., Immel, F., Nicolas, W. J., Glavier, M., Brocard, L., et al. (2019). Multiple  
309 C2 domains and transmembrane region proteins (MCTPs) tether membranes at plasmodesmata.  
310 *EMBO Rep.* 20, e47182. doi: 10.15252/embr.201847182
- 311 Brunkard, J.O., Runkel, A.M., and Zambryski, P.C. (2015). The cytosol must flow: intercellular  
312 transport through plasmodesmata. *Current Opinion in Cell Biology* 35, 13-20.  
313 doi:10.1016/j.ceb.2015.03.003
- 314 Ding, B., Turgeon, R., and Parthasarathy, M.V. (1992). Substructure of Freeze-Substituted  
315 Plasmodesmata. *Protoplasma* 169, 28-41. doi:10.1007/Bf01343367
- 316 Jackson, D., Veit, B., Hake, S.. (1994). Expression of maize *KNOTTED1* related homeobox genes in  
317 the shoot apical meristem predicts patterns of morphogenesis in the vegetative shoot. *Development*  
318 120, 405-413.
- 319 Geelen, D.N.V., and Inze, D.G. (2001). A bright future for the bright yellow-2 cell culture. *Plant*  
320 *Physiology* 127, 1375-1379. doi: 10.1104/pp.010708
- 321 Grison, M.S., Kirk, P., Brault, M.L., Wu, X.N., Schulze, W.X., Benitez-Alfonso, Y., Immel, F., and  
322 Bayer, E.M. (2019). Plasma Membrane-Associated Receptor-like Kinases Relocalize to  
323 Plasmodesmata in Response to Osmotic Stress. *Plant Physiology* 181, 142-160. doi:  
324 10.1104/pp.19.00473
- 325 Hajdukiewicz, P., Svab, Z., and Maliga, P. (1994). The small, versatile pPZP family of Agrobacterium  
326 binary vectors for plant transformation. *Plant Molecular Biology* 25, 989-994. doi:  
327 10.1007/BF00014672.
- 328 Han, X., Hyun, T.K., Zhang, M.H., Kumar, R., Koh, E.J., Kang, B.H., Lucas, W.J., and Kim, J.Y.  
329 (2014). Auxin-Callose-Mediated Plasmodesmal Gating Is Essential for Tropic Auxin Gradient  
330 Formation and Signaling. *Developmental Cell* 28, 132-146. doi:10.1016/j.devcel.2013.12.008
- 331 Han, X., and Kim, J.Y. (2016). Integrating Hormone- and Micromolecule-Mediated Signaling with  
332 Plasmodesmal Communication. *Molecular Plant* 9, 46-56. doi:10.1016/j.molp.2015.08.015
- 333 Kawade, K., Tanimoto, H., Horiguchi, G., and Tsukaya, H. (2017). Spatially Different Tissue-Scale  
334 Diffusivity Shapes *ANGUSTIFOLIA3* Gradient in Growing Leaves. *Biophys. J.* 113, 1109-1120.  
335 doi: 10.1016/j.bpj.2017.06.072
- 336 Kim, J., Erath, J., Rodriguez, A., and Yang, C. (2014). A high-efficiency microfluidic device for size-  
337 selective trapping and sorting. *Lab Chip* 14, 2480-2490. doi:10.1039/c4lc00219a
- 338 Knox, K., Wang, P., Kriechbaumer, V., Tilsner, J., Frigerio, L., Sparkes, I., et al. (2015). Putting the  
339 Squeeze on Plasmodesmata: A Role for Reticulons in Primary Plasmodesmata Formation. *Plant*  
340 *Physiol.* 168, 1563-72. doi: 10.1104/pp.15.00668

- 341 Lee, J.Y., and Lu, H. (2011). Plasmodesmata: the battleground against intruders. *Trends in Plant*  
342 *Science* 16, 201-210. doi:10.1016/j.tplants.2011.01.004
- 343 Lucas, W.J., Bouchepillon, S., Jackson, D.P., Nguyen, L., Baker, L., Ding, B., and Hake, S. (1995).  
344 Selective Trafficking of Knotted1 Homeodomain Protein and Its mRNA through Plasmodesmata.  
345 *Science* 270, 1980-1983. doi:10.1126/science.270.5244.1980
- 346 Lucas, W.J., Ham, L.K., and Kim, J.Y. (2009). Plasmodesmata - bridging the gap between neighboring  
347 plant cells. *Trends in Cell Biology* 19, 495-503. doi:10.1016/j.tcb.2009.07.003
- 348 Magyar, Z., De Veylder, L., Atanassova, A., Bakó, L., Inzé, D., and Bögre, L. (2005). The role of the  
349 Arabidopsis E2FB transcription factor in regulating auxin-dependent cell division. *Plant Cell* 17,  
350 2527-41. doi: 10.1105/tpc.105.033761
- 351 Maule, A.J. (2008). Plasmodesmata: structure, function and biogenesis. *Current Opinion in Plant*  
352 *Biology* 11, 680-686. doi:10.1016/j.pbi.2008.08.002
- 353 Miyazawa, Y., Nakajima, N., Abe, T., Sakai, A., Fujioka, S., Kawano, S., Kuroiwa, T., and Yoshida,  
354 S. (2003). Activation of cell proliferation by brassinolide application in tobacco BY-2 cells: effects  
355 of brassinolide on cell multiplication, cell-cycle-related gene expression, and organellar DNA  
356 contents. *Journal of Experimental Botany* 54, 2669-2678. doi:10.1093/jxb/erg312
- 357 Nagata, T., Nemoto, Y., and Hasezawa, S. (1992). Tobacco BY-2 cell line as the 'Hela' cell in the cell  
358 biology of higher plants. *International review of cytology* 132, 1-30. doi:10.1016/S0074-  
359 7696(08)62452-3
- 360 Nakajima, K., Sena, G., Nawy, T., and Benfey, P. N. (2001). Intercellular movement of the putative  
361 transcription factor SHR in root patterning. *Nature* 413, 307-11. doi: 10.1038/35095061
- 362 Nicolas, W.J., Grison, M.S., Trepout, S., Gaston, A., Fouche, M., Cordelieres, F.P., Oparka, K.,  
363 Tilsner, J., Brocard, L., and Bayer, E.M. (2017). Architecture and permeability of post-cytokinesis  
364 plasmodesmata lacking cytoplasmic sleeves. *Nature Plants* 3, 17082.  
365 doi:10.1038/nplants.2017.82.
- 366 Oparka, K. J., Roberts, A. G., Boevink, P., Santa Cruz, S., Roberts, I., Pradel, K. S., et al. (1999).  
367 Simple, but not branched, plasmodesmata allow the nonspecific trafficking of proteins in  
368 developing tobacco leaves. *Cell* 97, 743-54. doi: 10.1016/s0092-8674(00)80786-2
- 369 Roberts, A.G., and Oparka, K.J. (2003). Plasmodesmata and the control of symplastic transport. *Plant*  
370 *Cell and Environment* 26, 103-124. doi:10.1046/j.1365-3040.2003.00950.x
- 371 Schöffl, F., Raschke, E., and Nagao, R.T. (1984). The DNA sequence analysis of soybean heat-shock  
372 genes and identification of possible regulatory promoter elements. *EMBO Journal* 3, 2491-2497.  
373 doi:10.1002/j.1460-2075.1984.tb02161.x
- 374 Sessions, A., Yanofsky, M. F., and Weigel, D. (2000). Cell-cell signaling and movement by the floral  
375 transcription factors LEAFY and APETALA1. *Science* 289, 779-82. doi:  
376 10.1126/science.289.5480.779

- 377 Stonebloom, S., Burch-Smith, T., Kim, I., Meinke, D., Mindrinos, M., and Zambryski, P. (2009). Loss  
378 of the plant DEAD-box protein ISE1 leads to defective mitochondria and increased cell-to-cell  
379 transport via plasmodesmata. *Proc. Natl. Acad. Sci. U. S. A.* 106, 17229-34. doi:  
380 10.1073/pnas.0909229106
- 381 Turgeon, R., and Wolf, S. (2009). Phloem Transport: Cellular Pathways and Molecular Trafficking.  
382 *Annual Review of Plant Biology* 60, 207-221. doi:10.1146/annurev.arplant.043008.092045
- 383 Wu, X., Dinneny, J. R., Crawford, K. M., Rhee, Y., Citovsky, V., Zambryski, P. C., et al. (2003).  
384 Modes of intercellular transcription factor movement in the Arabidopsis apex. *Development* 130,  
385 3735-45. doi: 10.1242/dev.00577
- 386 Xu, M., Cho, E., Burch-Smith, T. M., and Zambryski, P. C. (2012). Plasmodesmata formation and cell-  
387 to-cell transport are reduced in decreased size exclusion limit 1 during embryogenesis in  
388 Arabidopsis. *Proc. Natl. Acad. Sci. U. S. A.* 109, 5098-103. doi: 10.1073/pnas.1202919109
- 389 Xu, X.M., and Jackson, D. (2010). Lights at the end of the tunnel: new views of plasmodesmal structure  
390 and function. *Current Opinion in Plant Biology* 13, 684-692. doi:10.1016/j.pbi.2010.09.003
- 391 Yamaoka, N., Shimizu, K., Imaizumi, Y., Ito, T., Okada, Y., and Honda, H. (2019). Open-Chamber  
392 Co-Culture Microdevices for Single-Cell Analysis of Skeletal Muscle Myotubes and Motor  
393 Neurons with Neuromuscular Junctions. *Biochip Journal* 13, 127-132. doi:10.1007/s13206-018-  
394 3202-3

395

## 396 **Figure legends**

397 **Figure 1.** Properties and shapes of BY-2 cells. **(A)** Drawing of a BY-2 cell. **(B)** Representative images  
398 of BY-2 cells under microscope. Scale bars, 200  $\mu\text{m}$ . **(C)** Distribution of number of cells in a single  
399 cluster of BY-2 cells on days 3, 5, and 7 of culture.

400 **Figure 2.** Design and fabrication of microfluidic device. **(A)** Fabricated microdevice with channels  
401 filled with blue-colored water. Scale bar, 5 mm. **(B)** Shape and size of microchannels.

402 **Figure 3.** Trapping of BY-2 cells in the microfluidic device. **(A)** Relationship between length of minor  
403 axis of approximate minimum ellipse and area of cell cluster. Closed circle: before cell separation.  
404 Open circle: after cell separation. BY-2 cells stained with CellTracker Green were used and 150  
405 clusters were analyzed for each condition. **(B)** Representative image of trapped cells. Scale bar, 500  
406  $\mu\text{m}$ . **(C)** Ratio of number of cells in the trapped clusters in microfluidic devices.

407 **Figure 4.** Culturing of trapped BY-2 cells inside the microfluidic device. **(A)** Representative image of  
408 trapped cells on days 0, 2 and 4 after trapping. Scale bars, 200  $\mu\text{m}$ . **(B)** Change in number of cells in a  
409 trapped single cluster (13 clusters were analyzed).

410 **Figure 5.** Quantitative analysis of plasmodesmata permeability. **(A)** Schematic illustration of  
411 conditions used in this experiment. NC, negative control. **(B)** Representative images of fluorescence  
412 recovery after photobleaching (FRAP) in experimental conditions (without NaCl). Slashed rectangles  
413 indicate laser-irradiated areas. Fluorescence intensities of photobleached nuclei were recovered by 200  
414 min after laser exposure (arrowheads). Scale bars, 100  $\mu\text{m}$ . **(C)** Quantitative comparison of relative

415 fluorescence intensity. Results of Tukey's HSD test are shown,  $p < 0.05$ ,  $n = 12$ , 4, and 5 for negative  
416 control (NC) and experimental conditions without and with 100 mM NaCl, respectively.

417

418 **Supplementary Figure 1** Procedure for image analysis of BY-2 cells using ImageJ.

419 **Supplementary Figure 2** Determination of fluorescence recovery after photobleaching (FRAP)  
420 experimental conditions. **(A)** Laser scanning microscope image of BY-2 cells expressing H2B-GFP.  
421 Slashed rectangle indicates laser-irradiated area in **(B)**. **(B)** Representative images of FRAP. Yellow  
422 and white arrowheads indicate nuclei with recovered and unrecovered GFP fluorescence, respectively.  
423 Slashed rectangles indicate areas magnified in **(C)**. **(C)** Magnified fluorescence image of recovered  
424 GFP. **(D)** Microscopic images of BY-2 cells in microfluidic device before and after photobleaching.  
425 Slashed rectangles indicate areas of fluorescence images. Circles indicate signal from *de novo*-  
426 expressed GFP at 24 h after photobleaching. Confocal laser microscopy images were merged from 10  
427 consecutive optical sections. Fluorescence images were merged with bright-field images in **(A, B)**.  
428 Scale bars, 200  $\mu\text{m}$  (A–C), 50  $\mu\text{m}$  (D).

429

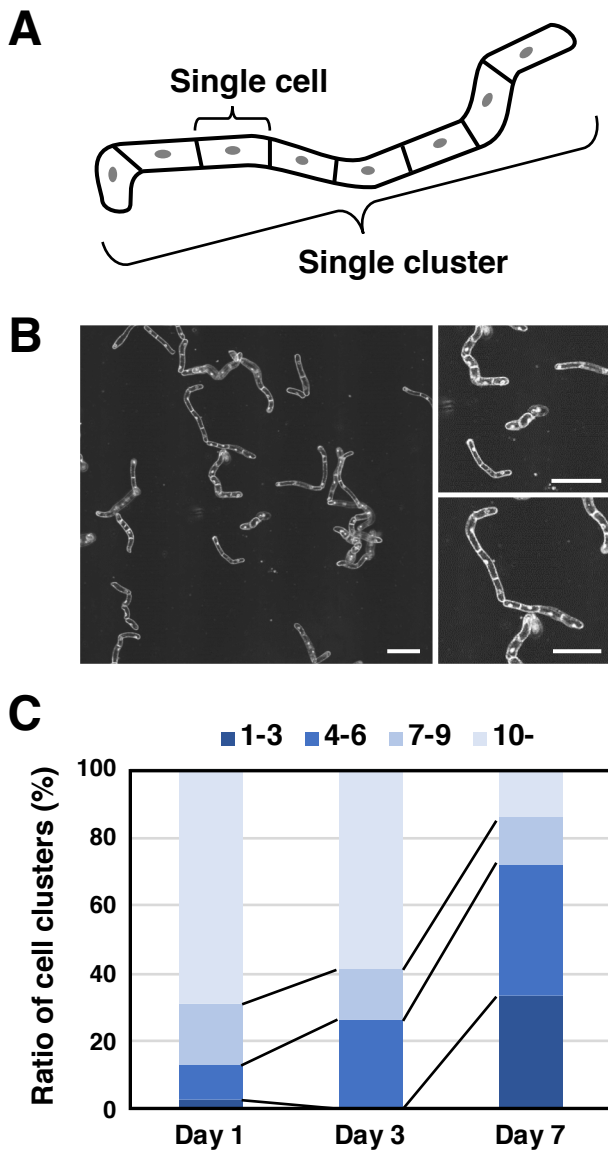

FIGURE 1



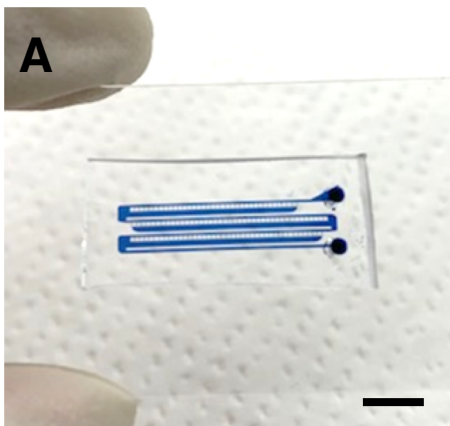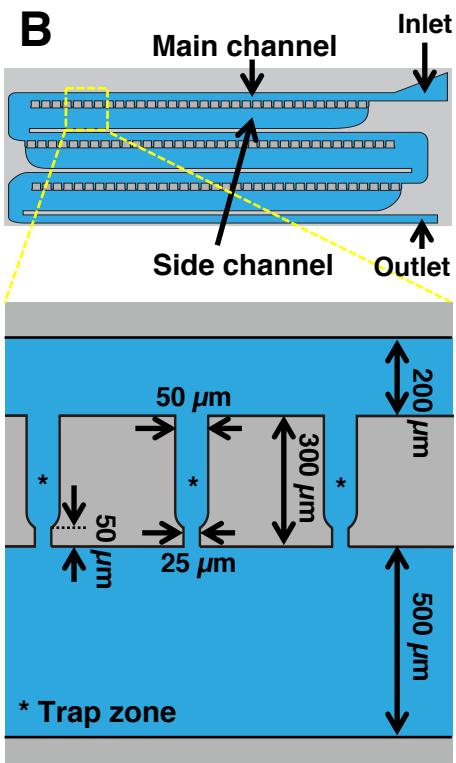

FIGURE 2

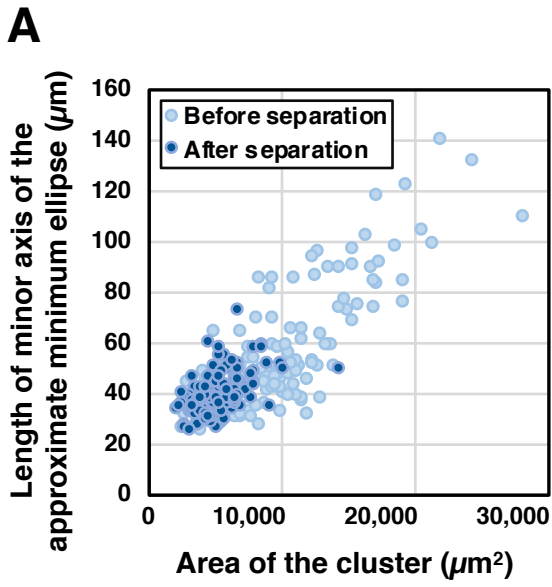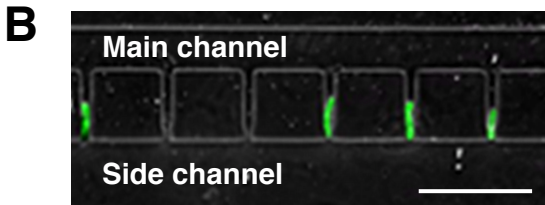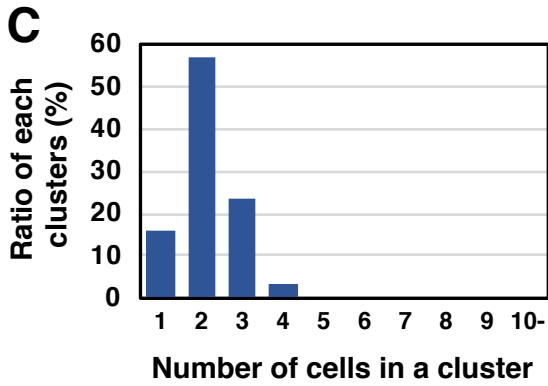

FIGURE 3

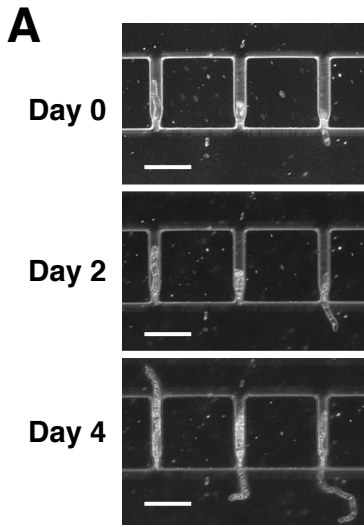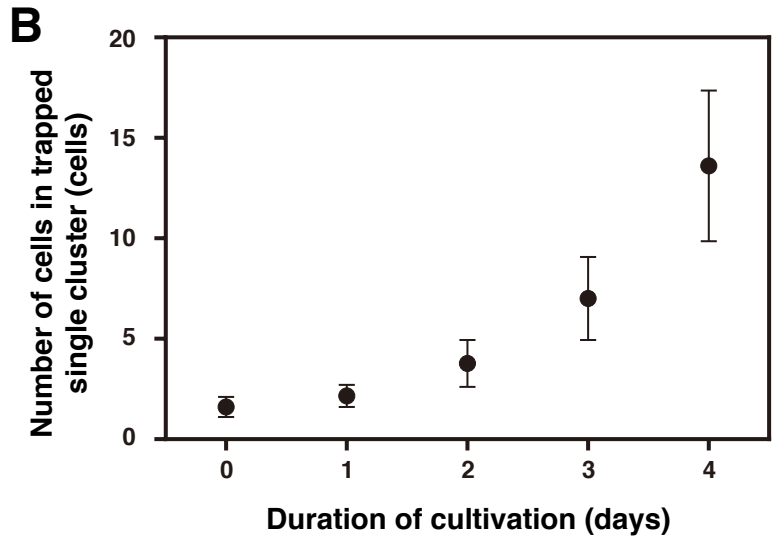

FIGURE 4

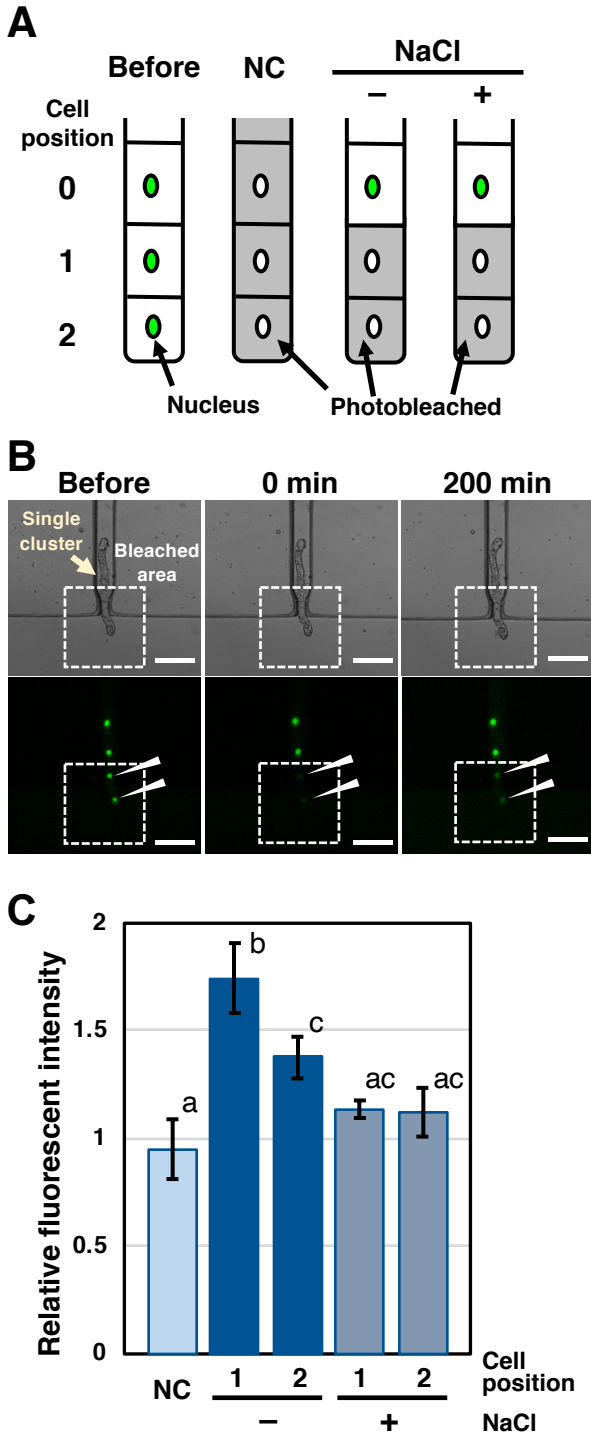

FIGURE 5
